# Supplementary material for: Chronic liver inflammation modifies DNA methylation at the precancerous stage of murine hepatocarcinogenesis
Source: PubMed Central journal article supplement (PMC4484438; doi:10.18632/oncotarget.3567), 2015-03-14
Supplement: oncotarget-06-11047-s001.pdf [file oncotarget-06-11047-s001.pdf]

# Chronic liver inflammation modifies DNA methylation at the precancerous stage of murine hepatocarcinogenesis

## SUPPLEMENTARY MATERIALS AND METHODS

**Mice.** Mice obtained a regular diet and drinking water *ad libitum* and under controlled conditions (22°C, 55% humidity, and 12-hour day-night rhythm). Only males were used in this study.

**Fractionation of liver cells.** Briefly, the livers were perfused with Liberase and live hepatocytes were isolated using precipitation by gravitation force and then by centrifugation in Percoll gradient. In addition, non-hepatocyte fraction was collected. DNA was purified using Wizard Genomic DNA Purification kit (Promega, WI, USA). RNA was purified using Trizol as described in Materials & Methods and treated with Ambion TURBO DNase (Life Technologies, CA, USA); the cDNA qScript Synthesis kit (Quanta, Biosciences, Gothenburg, Sweden) was used according to the manufacturer's instructions. Both fractions were checked for hepatocyte and T cell specific markers (Albumin and T-cell receptor, respectively; not shown).

**Real-time RT-PCR.** Threshold cycle numbers ( $C_t$ ) were determined with Sequence Detector Software (version 1.6) and transformed using the  $\Delta\Delta C_t$  method as described by the manufacturer. The relative quantification values for each gene were normalized against the endogenous "housekeeping" gene *Arl6ip1* or *Hprt*.

**Global DNA methylation measurements.** Liver genomic DNA was bisulfite-treated using EZ DNA Methylation Direct kit (Zymo Research, CA, USA) following the manufacturer protocol. PCR on bisulfite-treated DNA was performed in similarity with sqRT-PCR reactions (detailed in Semi-quantitative PCR Method) with the 0.1M primers designed with the assistance of the online tool MethPrimer [1]. Quantification of the 5mdC and 5hmdC global levels by liquid chromatography tandem mass spectrometry (LC-MS/MS) was performed on a Dionex Ultimate 3000 HPLC system interfaced with an AB SCIEX API 5000 Triple quadruple mass spectrometer

as described before [2] with the minor change of using the nucleoside analog Lamivudine as an internal standard.

**Methylated DNA immunoprecipitation followed by hybridization to CpG island microarray.** The enrichment of the precipitated fraction in methylated DNA was measured by real-time RT-PCR of the methylated CryaA gene and unmethylated Aprt gene on both DNA fractions ("methylated DNA enriched" and "input"). The Agilent G4811A array (printed using 60-mer SurePrint technology) originally designed based on the UCSC genome mm8, each contains 95,830 probes that tile through each of the 15,342 CpG islands. Each probe on the array was identified by its location on the genome and its associated gene(s) based on UCSC annotations. To increase statistical significance of the obtained results, all CGIs whose delta Z-score values were lower than 0.7 were excluded from the resulting tables. Thus, all methylated CGIs in this study (having the mark "1") have a high and a highly statistically significant methylation level.

**Methylation-sensitive restriction enzymes (MSRE) PCR.** One microgram of each DNA sample was digested in a 80µl reaction volume by HpaII or MspI endonucleases according to the manufacturer's instruction (NEB, MA, USA). The quality of digestion was assessed by gel electrophoresis; two microliters of the reaction mixture were used as a template for PCR. The intensities of the resulting bands in a gel were compared between experimental groups following normalization to the intensity of a PCR product of the control CryaA gene which does not contain HpaII/MspI recognition sites.

## References

1. Li LC, Dahiya R. *MethPrimer: designing primers for methylation PCRs*. *Bioinformatics* **2002**, 18(11):1427-31.
2. Jin SG, Jiang Y, Qiu R, Rauch TA, Wang Y, Schackert G, Krex D, Lu Q, Pfeifer GP. *5-Hydroxymethylcytosine is strongly depleted in human cancers but its levels do not correlate with IDH1 mutations*. *Cancer Res* **2011**, 71(24):7360-5.

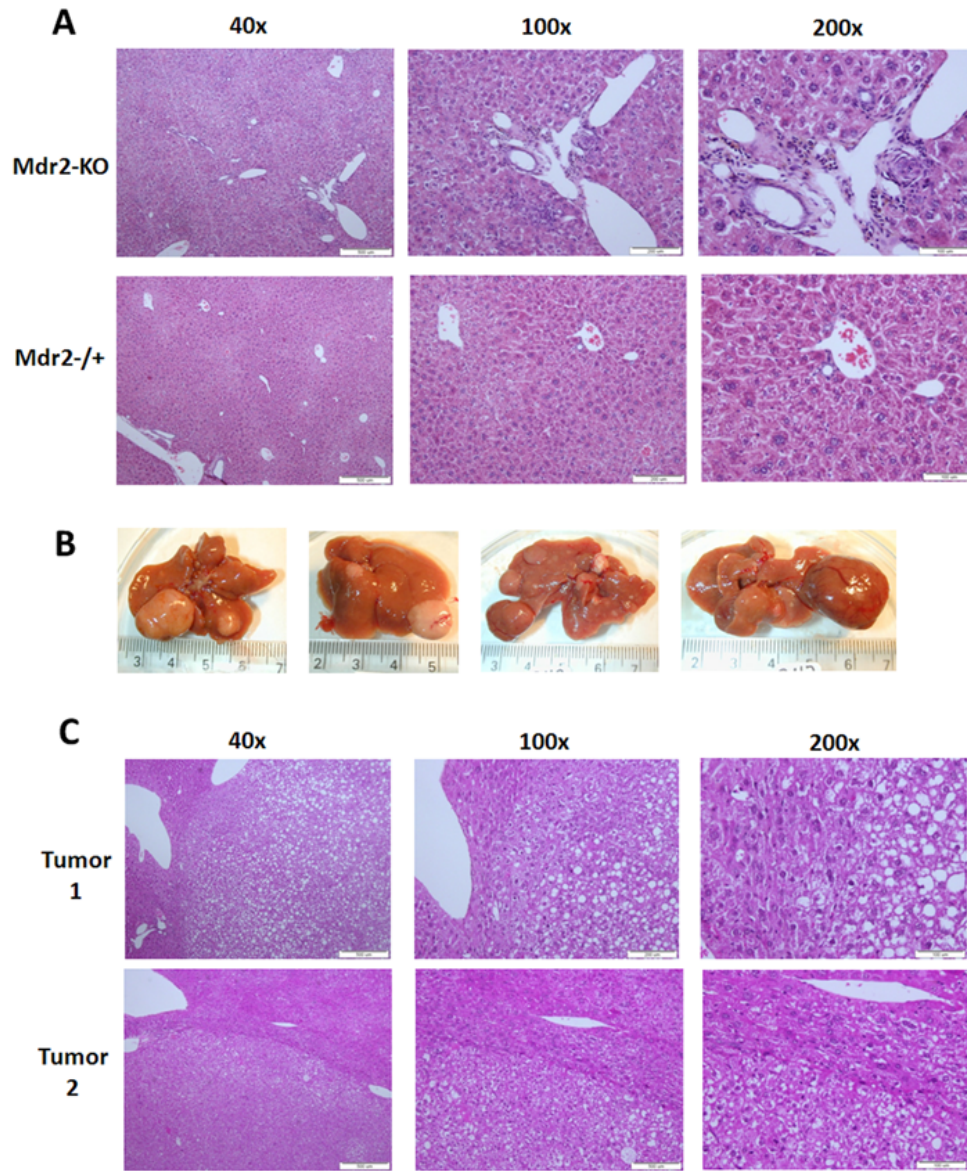

**Supplementary Figure 1: Liver of Mdr2-KO mice at the late precancerous and cancer stages.** (A) Portal inflammation in the liver of 12-month-old Mdr2-KO compared to control healthy Mdr2<sup>+/+</sup> male mouse (H & E staining, magnifications 40x, 100x, 200x). (B) Morphology of liver tumors of the 16-month-old Mdr2-KO male mice. (C) Histology of liver tumors of the 16-month-old Mdr2-KO male mice (H & E staining; magnifications 40x, 100x, 200x).

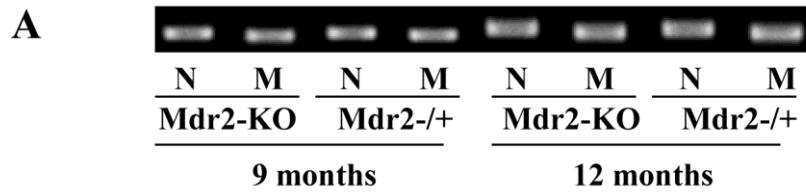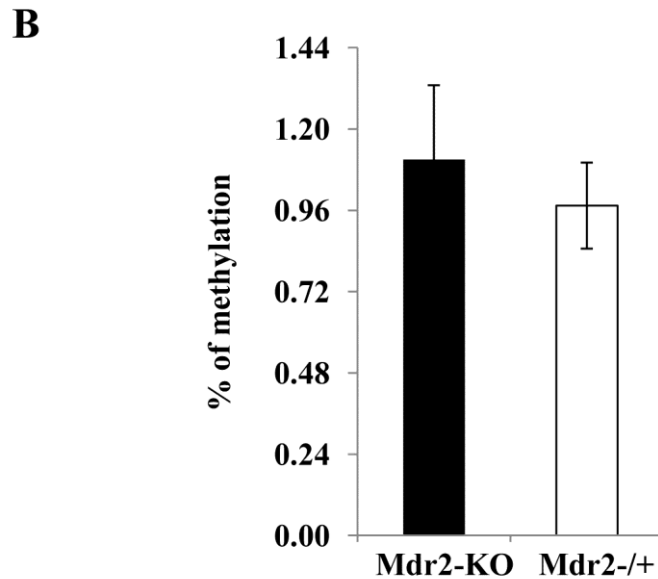

**Supplementary Figure 2: Total DNA methylation at the precancerous stages.** Similar methylation levels of total liver DNA in Mdr2-KO and control mice, as measured by (A) RT-PCR of the SINE elements of 9- and 12-month-old mice and by (B) Methyl-Flash Colorimetric assay at the age of 12 months (representative gel); “N” - non-methylated, “M” - methylated sequence primers; 3 mice per group;  $p > 0.05$  for all cases.

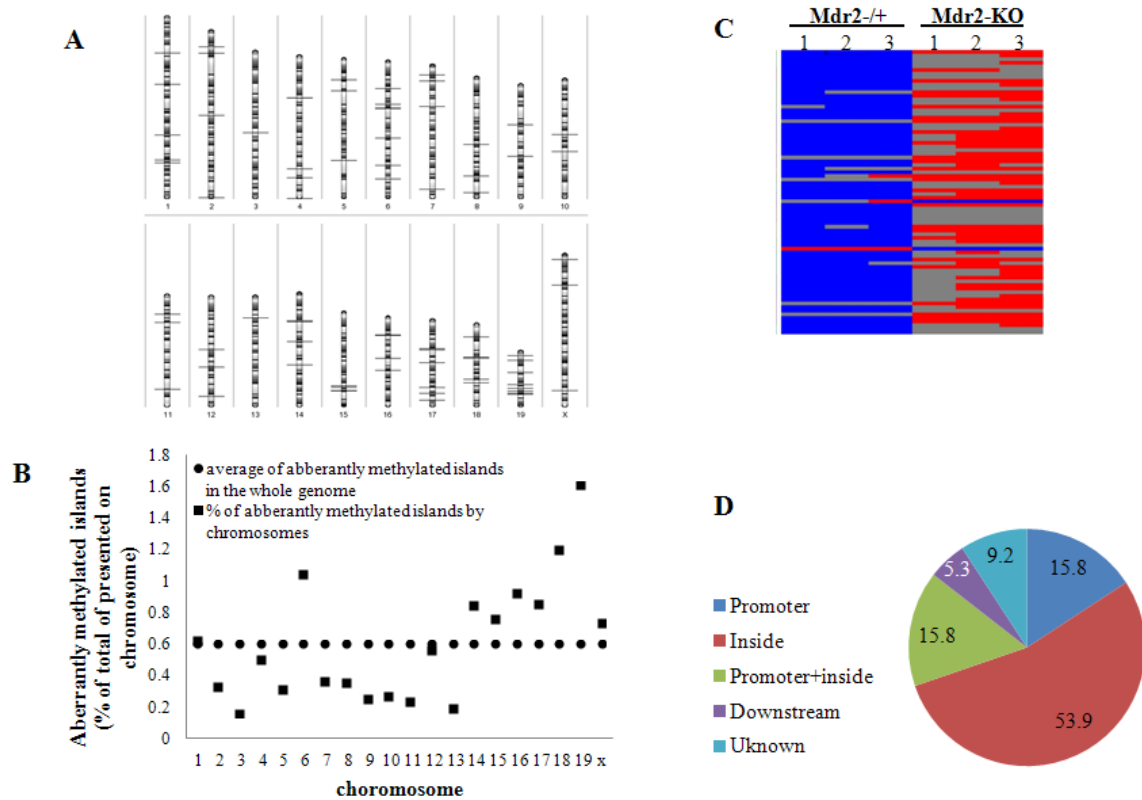

**Supplementary Figure 3: Characterization of the CGIs which were aberrantly methylated in Mdr2-KO liver at the late precancerous stage.** Seventy eight aberrantly methylated CGIs represented as: a genome map (A), a distribution relative to the expected CGI methylation in chromosomes (B); a distribution of microarray triplicates (C); and a location relative to a proximal gene (D).

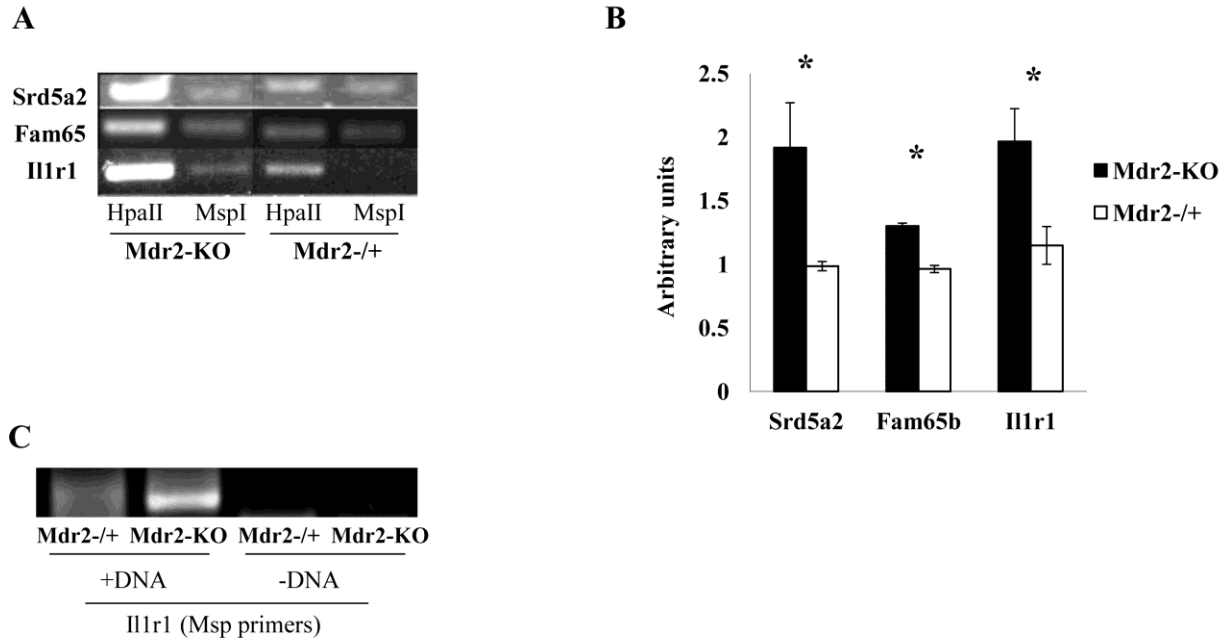

**Supplementary Figure 4: Confirmation of the CGI microarray's results.** 18 of the 20 tested genes were confirmed. A representative gel for Srd5a2, Fam65b and Il1r1 in 12-month-old mice is shown, as measured by MSRE-PCR after HpaII/MspI restriction (A) and quantified by ScionImage software (B), normalized to CryaA; three males per each experimental group; \* $p < 0.05$ . (C) Confirmation of the Il1r1 gene hypermethylation by bisulfite Msp-PCR; 12-month-old Mdr2-KO liver; sample mix of 3 males per group.

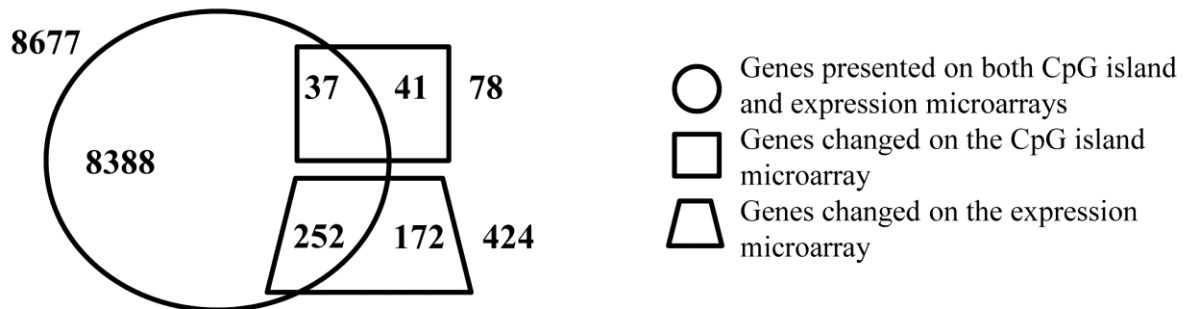

**Supplementary Figure 5: Absence of an overlap between aberrantly methylated and aberrantly expressed genes.** The Affymetrix gene expression and Agilent CpG island murine genome-scale microarrays had at least a 50% overlap: 8,677 common genes were represented on both arrays. 424 genes were aberrantly expressed (threshold > 1.9 fold;  $p < 0.05$ ) and 78 genes were aberrantly methylated ( $Z$  score > 0.7) in the liver of Mdr2-KO compared to Mdr2<sup>-/+</sup> mice at the late precancerous stage (three 12-month-old males per group). None of the genes was simultaneously aberrantly methylated and expressed, as detected by microarrays.



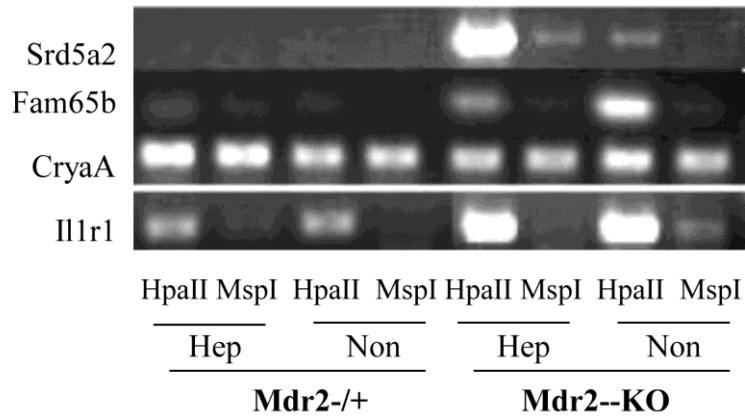

**Supplementary Figure 6: Methylation of selected genes in liver cell fractions.** Srd5a2 hypermethylated in Mdr2-KO hepatocytes (Hep) and Fam65b and Il1r1 hypermethylated in both Mdr2-KO hepatocyte (Hep) and non-hepatocyte fractions (Non). Representative gel of MSRE-PCR; quantification was performed by normalization to CryaA and relative to Mdr2<sup>-/+</sup>, using the ScionImage software; three 12-month-old males per group. Significance – at p < 0.05.

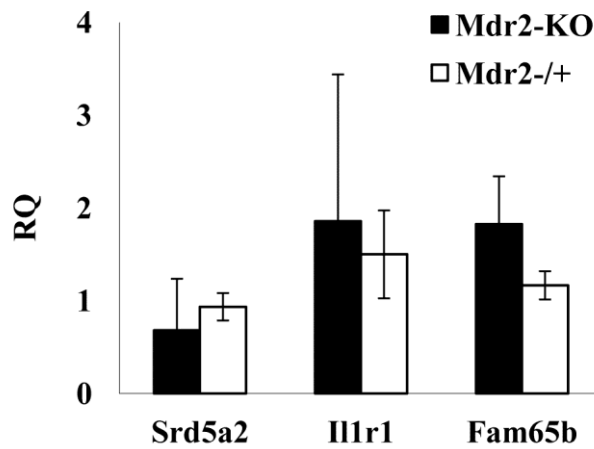

**Supplementary Figure 7: Similar whole liver tissue expression of selected genes at the late precancerous stage.** Srd5a2, Il1r1 and Fam65b genes expressed similarly in the livers of Mdr2-KO and Mdr2<sup>+/-</sup> 12-month-old mice. Real-time RT-PCR, normalized to Gapdh/Hprt; three 12-month-old males per group,  $p > 0.05$ .



**Supplementary Table 1: Chronic inflammation-induced pattern of CGIs'**

**hypermethylation at the late precancerous stage.** Arbitrary methylation levels, as determined using MeDIP followed by hybridization with CpG island microarray, of CGIs in the liver of Mdr2-KO and control Mdr2<sup>+/+</sup> mice (FVB/N, 12-month-old), in non-tumor (NT) and tumor (T) liver tissues of Mdr2-KO mice (FVB/N, 16-month-old), and in colon, brain, kidney, liver, lung, pancreas and spleen tissues of healthy C57BL/6 mice (3-month-old). Increasing levels of methylation: "-" (0% - 10%), "0" (11% – 69%), "+" (70% - 100%). Location of a CGI in a gene: "P" – promoter, "I" – inside gene body, "D" – downstream gene body, "U" - unknown. The first 30 CGIs of 30 genes were specifically hypermethylated in the Mdr2-KO liver at the late precancerous stage (12-month-old mice of the FVB/N strain) but mostly not in other murine tissues (3-month-old mice of the C57BL/6 strain).

| CpG island in | Gene    | Mdr2 -/+ |   |   | Mdr2-KO precancer |   |   | NT | T | liver <sup>†</sup> | colon | brain | kidney | lung | muscle | pancreas | spleen | Intestine |
|---------------|---------|----------|---|---|-------------------|---|---|----|---|--------------------|-------|-------|--------|------|--------|----------|--------|-----------|
|               |         | -        | - | - | +                 | + | + |    |   |                    |       |       |        |      |        |          |        |           |
| P, I          | Cdpf1   | -        | - | - | +                 | + | + | +  | - | -                  | -     | -     | -      | -    | -      | -        | -      | -         |
| I             | Adam11  | -        | - | - | +                 | + | + | +  | + | -                  | -     | -     | -      | -    | -      | -        | -      | -         |
| I             | Ccdc79  | -        | - | - | +                 | + | + | +  | + | -                  | -     | -     | -      | -    | -      | -        | -      | -         |
| I             | Fam65b  | -        | - | - | +                 | + | + | +  | + | -                  | -     | -     | -      | -    | -      | -        | -      | -         |
| U             | Klf14   | -        | - | - | +                 | + | + | +  | + | -                  | -     | -     | -      | -    | -      | -        | -      | -         |
| I             | Srd5a2  | -        | - | - | +                 | + | + | +  | + | -                  | -     | -     | -      | -    | -      | -        | -      | -         |
| P, I          | Bmp8b   | -        | - | - | +                 | + | + | +  | + | -                  | -     | -     | 0      | -    | -      | -        | -      | -         |
| I             | Nfkb2   | -        | - | - | +                 | + | + | +  | + | -                  | -     | -     | 0      | 0    | -      | -        | 0      | -         |
| I             | Mzfl    | -        | - | - | +                 | + | + | +  | + | -                  | 0     | -     | 0      | -    | -      | -        | -      | -         |
| I             | Fam196a | -        | - | - | 0                 | + | + | +  | + | -                  | -     | -     | -      | -    | -      | -        | -      | -         |
| I             | Pkdrej  | -        | - | - | 0                 | + | + | +  | 0 | -                  | -     | -     | -      | -    | -      | -        | -      | -         |
| U             | Synpo   | -        | - | - | 0                 | + | + | 0  | + | -                  | -     | -     | -      | -    | -      | -        | -      | -         |
| P             | Fam131a | -        | - | - | 0                 | + | + | +  | 0 | -                  | -     | -     | 0      | -    | -      | -        | 0      | -         |
| P, I          | Fbrs1l  | -        | - | - | 0                 | + | 0 | +  | + | -                  | -     | -     | -      | -    | -      | -        | -      | -         |
| P, I          | Tigd3   | -        | - | - | 0                 | + | 0 | 0  | 0 | -                  | -     | -     | -      | -    | -      | -        | -      | -         |
| U             | Tns1    | -        | - | - | 0                 | + | 0 | -  | + | -                  | -     | -     | -      | -    | -      | -        | -      | -         |
| I             | Shcbp1l | -        | - | - | 0                 | + | 0 | -  | 0 | -                  | 0     | -     | -      | -    | -      | -        | -      | -         |
| U             | Gm10190 | -        | - | - | 0                 | + | 0 | 0  | + | -                  | 0     | -     | -      | 0    | -      | -        | -      | 0         |
| U             | Ddx43   | -        | - | - | 0                 | 0 | 0 | 0  | + | -                  | -     | -     | -      | -    | -      | -        | -      | -         |
| P, I, D       | Foxe1   | -        | - | - | 0                 | 0 | 0 | 0  | + | -                  | -     | -     | -      | -    | -      | -        | -      | -         |
| P, I          | Hmx1    | -        | - | - | 0                 | 0 | 0 | 0  | + | -                  | -     | -     | -      | -    | -      | -        | -      | -         |
| I             | Pcdh8   | -        | - | - | 0                 | 0 | 0 | 0  | + | -                  | -     | -     | -      | -    | -      | -        | -      | -         |
| P, I          | Psme4   | -        | - | - | 0                 | 0 | 0 | 0  | + | -                  | -     | -     | -      | -    | -      | -        | -      | -         |
| I             | Slc18a3 | -        | - | - | 0                 | 0 | 0 | +  | + | -                  | -     | -     | -      | -    | -      | -        | -      | -         |

|      |               |   |   |   |   |   |   |   |   |   |   |   |   |   |   |   |   |
|------|---------------|---|---|---|---|---|---|---|---|---|---|---|---|---|---|---|---|
| P    | St8sia3       | - | - | - | 0 | 0 | 0 | 0 | + | - | - | - | - | - | - | - | - |
| P    | Tdrd5         | - | - | - | 0 | 0 | 0 | - | + | - | - | - | - | - | - | - | - |
| P, I | Ephb3         | - | - | - | 0 | 0 | 0 | 0 | + | - | - | 0 | - | - | - | - | - |
| I    | Nckap5        | - | - | - | 0 | 0 | 0 | + | + | - | - | 0 | - | - | - | - | - |
| P    | Bcl9l         | 0 | - | 0 | + | + | + | + | + | - | - | - | - | - | - | - | - |
| I    | Trim14        | 0 | - | 0 | + | + | + | + | + | - | - | 0 | - | - | - | - | - |
| I    | Mapk8ip1      | - | - | - | 0 | 0 | 0 | - | + | - | - | - | - | - | - | - | - |
| I    | B3galt4       | - | - | - | + | + | + | + | + | - | - | - | - | - | - | - | - |
| I    | Tspan9        | - | - | - | 0 | + | + | + | + | - | - | - | - | - | - | - | + |
| I    | Fosb          | - | - | - | 0 | + | + | + | + | - | - | - | - | + | - | - | - |
| I    | Arhgap22      | - | - | - | 0 | 0 | 0 | 0 | + | - | - | - | - | + | - | - | 0 |
| D    | Cpeb3         | - | - | - | 0 | + | + | + | 0 | - | - | - | 0 | 0 | - | - | - |
| U    | Zfp518a       | - | - | - | 0 | 0 | 0 | 0 | 0 | - | - | - | + | - | - | - | - |
| U    | Gm70          | - | - | - | + | + | + | + | + | - | - | - | + | 0 | - | - | - |
| P    | Hoxa3         | - | - | - | 0 | 0 | 0 | - | + | - | - | - | + | 0 | 0 | 0 | - |
| I    | Kcnk12        | - | - | - | 0 | + | 0 | 0 | + | - | - | - | + | 0 | + | - | 0 |
| I    | Dnmbp         | 0 | 0 | 0 | + | + | + | + | + | - | - | 0 | - | - | - | - | - |
| I    | Nodal         | 0 | - | + | + | + | + | + | + | - | - | 0 | - | - | - | - | - |
| P    | Phldb2        | + | + | + | - | - | - | - | - | - | - | + | - | - | - | - | - |
| P, I | Mmp23         | - | - | - | 0 | 0 | 0 | 0 | + | - | 0 | - | - | - | - | - | - |
| P    | Emp3          | - | - | - | 0 | 0 | 0 | 0 | 0 | - | 0 | - | - | 0 | - | - | - |
| I    | Ahdc1         | - | - | - | 0 | + | 0 | 0 | + | - | 0 | - | 0 | - | - | - | - |
| P, I | Fam83f        | - | - | - | 0 | 0 | 0 | 0 | + | - | 0 | - | + | 0 | - | - | 0 |
| I    | Prrt3         | - | - | - | 0 | + | + | 0 | + | - | 0 | - | + | 0 | - | - | 0 |
| I    | Gpr44         | - | - | - | 0 | + | + | + | + | - | 0 | - | + | 0 | 0 | - | 0 |
| P, I | Isyna1        | 0 | 0 | 0 | + | + | + | + | + | - | 0 | - | + | 0 | 0 | - | 0 |
| I    | Kctd1         | - | - | - | 0 | + | + | + | + | - | 0 | - | + | + | 0 | - | + |
| P, I | Tcf15         | - | - | - | + | + | + | + | + | - | + | - | + | - | - | - | - |
| I    | 4921506M07Rik | - | - | - | 0 | + | + | + | + | - | + | - | + | 0 | 0 | - | 0 |
| I    | Mex3a         | - | - | - | 0 | + | 0 | + | + | - | + | - | + | 0 | 0 | - | + |
| P, I | 2700086A05Rik | - | - | - | 0 | + | 0 | + | + | - | + | - | + | + | + | - | + |
| I    | Sh3pxd2a      | - | - | - | + | + | + | + | + | - | + | 0 | - | - | - | - | + |
| P, I | Zfp783        | 0 | 0 | 0 | + | + | + | + | + | - | + | 0 | + | 0 | - | - | 0 |
| I    | Rem2          | - | - | - | 0 | 0 | 0 | 0 | 0 | 0 | - | - | - | - | - | - | - |
| I    | Illr1         | - | - | - | + | + | + | + | + | 0 | - | - | - | - | - | - | 0 |
| I    | Cyba          | - | - | - | 0 | 0 | + | 0 | + | 0 | - | - | - | 0 | - | - | - |
| I    | Foxp4         | - | - | 0 | 0 | 0 | + | + | + | 0 | - | - | - | + | - | - | 0 |
| D    | Otx1          | - | - | - | 0 | + | 0 | 0 | + | 0 | - | - | 0 | - | - | - | - |
| I    | Cyp4f39       | - | - | - | 0 | 0 | 0 | + | + | 0 | - | - | 0 | 0 | - | - | - |
| D    | Tspy12        | - | - | - | 0 | 0 | 0 | + | 0 | 0 | 0 | - | - | 0 | - | - | - |
| I    | Pcdha3        | - | - | - | 0 | ? | 0 | + | + | 0 | 0 | - | + | 0 | 0 | 0 | + |
| P    | Pcdhgb2       | - | - | - | 0 | + | + | + | 0 | 0 | 0 | - | + | + | + | - | 0 |
| I    | Celsr1        | - | - | - | + | + | + | + | + | 0 | 0 | 0 | + | + | 0 | - | + |
| I    | C2cd4c        | 0 | 0 | 0 | + | + | + | + | + | 0 | + | 0 | - | - | - | 0 | - |
| I    | Cyp46a1       | 0 | 0 | + | - | - | - | - | 0 | + | - | - | - | - | - | - | 0 |

|      |                    |   |   |   |   |   |   |   |   |   |   |   |   |   |   |   |   |   |
|------|--------------------|---|---|---|---|---|---|---|---|---|---|---|---|---|---|---|---|---|
| P    | Zfp3611b (non-mus) | - | - | - | 0 | 0 | 0 | 0 | 0 | + | - | + | + | + | + | - | + | - |
| I    | Bmi1               | - | - | - | + | 0 | + | 0 | 0 | + | 0 | 0 | - | + | - | - | + | + |
| I    | Dysf               | - | - | - | + | + | + | + | 0 | + | 0 | 0 | + | + | + | + | + | + |
| P, I | Prpf2              | - | - | - | 0 | + | 0 | 0 | 0 | + | 0 | + | + | + | + | - | + | - |
| I    | Gm996              | - | - | - | 0 | 0 | 0 | 0 | + | + | + | - | + | 0 | - | - | 0 | + |
| D    | Mir33              | 0 | - | - | + | + | + | + | + | + | + | + | - | + | + | + | - | + |

\* similar in 12-month-old C57Bl/6 mice

† similar in 12- and 18-month-old C57Bl/6 mice

**Supplementary Table 2: Four patterns of DNA demethylation in Mdr2-KO compared to Mdr2<sup>-/+</sup> liver at 9 and 12 months of age.** Gene symbols of the selected genes which comprise four groups based on different age-dependent methylation patterns (see Fig. 3) in Mdr2-KO compared to Mdr2<sup>-/+</sup> liver at the precancerous stages (9- and 12-month-old mice).

| Methylation pattern | Genes (#) | Gene symbols                                                               |
|---------------------|-----------|----------------------------------------------------------------------------|
| A                   | 11        | Adam11, Fam65b, Fosb, Il1r1, Mzf1, Nfkb2, Otx1, Synpo, Tcf15, Tns1, Tspan9 |
| B                   | 4         | Ephb3, Pcdh8, Psme4, Srd5a2                                                |
| C                   | 2         | Bmp8b, Fam196a                                                             |
| D                   | 1         | Ccdc79                                                                     |

**Supplementary Table 3: Expression of selected aberrantly methylated genes in the whole liver gene at the late precancerous stage.** Relative expression (Mdr2-KO compared to Mdr2<sup>-/+</sup> liver) of the selected genes at the late precancerous stage (12-month-old mice) tested by RT-PCR. “Up” – upregulated, “Down” – downregulated in the Mdr2-KO compared to Mdr2<sup>-/+</sup> liver. At least three males per experimental group. Most represented genes were hypermethylated, while Lrrc16a and Phldb2 were hypomethylated in the Mdr2-KO compared to Mdr2<sup>-/+</sup> liver at this age.

| Methylation pattern | Total | Expressed in the liver |         |                              | Not expressed                       |
|---------------------|-------|------------------------|---------|------------------------------|-------------------------------------|
|                     |       | Up                     | Down    | Unchanged                    |                                     |
| Real-Time PCR       | 6     | 1                      | 0       | 4                            | 1                                   |
|                     |       | Bmp8b                  |         | Adam11, Il1r1, Klf14, Srd5a2 | Fam65b                              |
| sqRT-PCR            | 12    | 3                      | 1       | 3                            | 5                                   |
|                     |       | Cyba, Mmp23, Synpo     | Lrrc16a | Ethe1, Phldb2, St8sia3       | Ccdc79, Foxe1, Gm70, Slc18a3, Tcf15 |



**Supplementary Table 4: Comparative methylation of selected genes in the tumor and matched non-tumor liver tissues of Mdr2-KO mice.** Methylation levels of the five selected genes were tested in seven HCC tumors (T) and their matched non-tumor (N) liver tissues of 16-month-old Mdr2-KO mice (cancerous stage). Numbers of tumors with preferential methylation of non-tumor (N>T) or tumor (T>N) liver tissue are shown. The selected genes were hypermethylated in the Mdr2-KO compared to Mdr2<sup>-/+</sup> non-tumor liver tissue at the late precancerous stage (12-month-old mice).

| <b>Genes</b> | <b>N &gt; T</b> | <b>T &gt; N</b> | <b>N = T</b> |
|--------------|-----------------|-----------------|--------------|
| Srd5a2       | 3               | 3               | -            |
| Fam65b       | 5               | 2               | -            |
| Il1r1        | 5               | 1               | 1            |
| Synpo        | 1               | 5               | 1            |
| Tspan9       | 1               | 5               | 1            |

**Supplementary Table 5: PCR primers used in this study.** Primers for expression assay were chosen from different exons, primers for MSRE include CCGG restriction site. All primers are of mouse origin. Excluding primers for the Tet genes and for Taqman and SYBR RT-PCR assays, all other primers were designed using the Primer3 software [1]. Primers for quantitative RT-PCR of the Tet1 and Tet2 genes are described in [2].

| Gene symbol | Forward primer          | Reverse primer          | PCR method* | Product size | PCR assay       |
|-------------|-------------------------|-------------------------|-------------|--------------|-----------------|
| Adam11      | CGGAAACGGCTTCGTGGAGG    | CGGTCCCGGGTTTACAGCG     | SYBR        | 315          | gene expression |
| Bcl9l       | CGCCAGTCTGCCAACCGG      | GCGAGGCAGCGAGCGAGGTT    | SQ          | 140          | gene expression |
| Cyba        | GGTATTTGCGCGCCTAC       | ACTTCTGTCCACATCGC       | SQ          | 108          | gene expression |
| Fam65b      | GGGCCCAATGGCATCATCCG    | AAGGCCCGGTAGACCTCCTC    | SYBR        | 165          | gene expression |
| Foxe1       | TTCGGCTTGGTTCCCGAGCG    | TCCGAGTTGCCACCGGGAT     | SQ          | 378          | gene expression |
| Gm70        | GCGTGGCGGTATCCAGGTG     | CCTGGAGGGACAGCAGGGCA    | SQ          | 392          | gene expression |
| Otx1        | CCCCATACGGCATGAACGG     | CGGCCGGGTTTTCGTTCCATT   | SYBR        | 300          | gene expression |
| Pcdh8       | TGGACCGTGAGCGTCTGTGT    | GAGGCTCGGCTAGGCGTACA    | SYBR        | 264          | gene expression |
| Synpo       | GGCCCTCCAAACAGGGCGTC    | CAGCGGTGGGCTGACTGTGG    | SYBR        | 422          | gene expression |
| Tspyl2      | AGGCTCTGGATAACCGCACCA   | AAGCTTTGGGACCGGCAGC     | SYBR        | 213          | gene expression |
| Cbs         | CTCACATCCTGGAGATGGAC    | GGTGTCTCTGAAAGCCAAGA    | SQ          | 255          | gene expression |
| Cxcl14      | ACGGGTCCAAGTGAAGTGT     | GCAAAGTCCTCTGCTGAAGT    | SQ          | 301          | gene expression |
| Dgkz        | CAGATCAGCCCCGGCATGGAGAC | CCCACCCCGCAGCTGGGAAA    | SQ          | 213          | gene expression |
| Egfr        | TCCTGGAGGGGAACCAAGGGA   | GGCCAATCCAAGGGCCACCA    | SQ          | 381          | gene expression |
| Bmp8b       |                         | MM03033968_m1           | TQ          |              | gene expression |
| Il1r1       |                         | MM00434237_m1           | TQ          |              | gene expression |
| Srd5a2      |                         | MM00446421_m1           | TQ          |              | gene expression |
| Klf14       |                         | MM03646643_s1           | TQ          |              | gene expression |
| Ube2a       |                         | MM00499179_m1           | TQ          |              | gene expression |
| Mmp23       | CGGTACAGGGCCGCTGGTTG    | GTGTCAGCGTGTAGCGGCGT    | SQ          | 210          | gene expression |
| Synpo       | GGCCCTCCAAACAGGGCGTC    | CAGCGGTGGGCTGACTGTGG    | SQ          | 422          | gene expression |
| Lrrc16a     | GGTGAGTAGGTCCAATCGAC    | CAGGCCAAGAGCAGCG        | SQ          | 623          | gene expression |
| Stx11       | GTTCGGGGTTGGCTGGAG      | CTCTGCAAGCCGATCCTTC     | SQ          | 217          | gene expression |
| Pim1        | GATCATCAAGGGCCAAGTGT    | GATGGTTCCGGATTCTTCA     | SQ          | 122          | gene expression |
| Ethe        | ACTGTCTGATCTACCCTGCTCA  | TTGACAAACTCCTCACAGCTGA  | SQ          | 823          | gene expression |
| Mbd2        | CCGACATCCTGTCCCGGGCT    | GCTGCACTGCACCGGAAGGG    | SQ          | 328          | gene expression |
| Mmp14       | CACCCACTGCGCTTCCGAG     | GTTGGGCCCATAGGCGGGGT    | SQ          | 490          | gene expression |
| Mtss1       | TGGGTGCAGGCCCTTTCCT     | GGCTTTGCCAGTCTTCCAGC    | SQ          | 154          | gene expression |
| Pdk4        | GCCAGCCTAGGTGGGCGTCA    | CCGTGGCCCTCATGGCATTCTTG | SQ          | 812          | gene expression |
| Stmn1       | CGGACCGAGCAGGGCTTCCCT   | GCCATCTGCGCTCCCGGTT     | SQ          | 422          | gene expression |
| Arl6ip1     | GTGTTCGCTCGTTGATAACCG   | CCCATCGAAGGACTTTGTGAG   | SQ, SYBR    | 156          | gene expression |
| Arl6ip1     |                         | MM01274631_m1           |             |              | gene expression |
| Hprt        | GTTAAGCAGTACAGCCCCAAA   | AGGGCATATCCAACAACAACTT  | SQ, SYBR    | 130          | gene expression |

| Hprt    | MM00446968_m1            |                                      | TQ       |     | gene expression               |
|---------|--------------------------|--------------------------------------|----------|-----|-------------------------------|
| mtD1    | CCACCAACAGCTACCATTAC     | TGGGTTTATGAGGTCTGGGT                 | SQ       | 747 | mitochondrial DNA             |
| mtDNA   | GCTCTACCTCACCATCTCTTG    | CCAGTATGCTTACCTTGTTACG               | SQ       | 360 | mitochondrial DNA             |
| Ccdc79  | CCCAGCCTCCGGGTCCACCG     | CGGGAGGCGTGCATGGTGCC                 | SQ       | 172 | MSRE                          |
| Ephb3   | GTGCCCCGAGAACCTGCGAC     | GATGCCGGCAGGTCGTTCCC                 | SQ       | 127 | MSRE                          |
| Fam65b  | AGCGCTGGGGCCACGACTGT     | ACCACCTCGGCACCCACGCA                 | SQ       | 122 | MSRE                          |
| Fosb    | GCTGCTCGCTGCCGCTGGTG     | AGCAGCCGAGACGCACCCCC                 | SQ       | 175 | MSRE                          |
| Mzf1    | TGGATGGCGCTGGACCAGGC     | GGCCTTTCGTGTGCCCGAC                  | SQ       | 186 | MSRE                          |
| Nfkb2   | CGGGACACCGATGCTGGCGA     | TCCCGTAGCAGAGCACGCG                  | SQ       | 275 | MSRE                          |
| Otx1    | GCGAGCGGACAGACACGGGC     | CCGCCGAGCACGCCTGCAAC                 | SQ       | 369 | MSRE                          |
| Pcdh8   | ACGTCTCGGATGCGCACGAT     | GCAGGTGGACTACGAGCGCC                 | SQ       | 111 | MSRE                          |
| Srd5a2  | AACCAGGCTATGCGTGCGGG     | GGCGCTCCATAAAGGGGGCC                 | SQ       | 230 | MSRE                          |
| Synpo   | CTGCGCAGGTGGCAAGGGCGA    | GGCTCCCCTTGGGTCCCCTTCA               | SQ       | 240 | MSRE                          |
| Tspan9  | GGTGCCGTAGAAGGCGCCAG     | GCTCAGAACCCGTGCCCGAC                 | SQ       | 230 | MSRE                          |
| Adam11  | AAACGGCTTCGTGGAGGCGG     | CTCACCTTGAGCGGGCGACA                 | SQ       | 265 | MSRE                          |
| Il1r1   | AGCGCGGCGCCACCTAGAA      | CGGGTGCCCCAGTGGCGATG                 | SQ       | 186 | MSRE                          |
| Tcf15   | CGCACTTGTGAGCGCCACG      | GACCGTACGCGTCCGTCTGG                 | SQ       | 107 | MSRE                          |
| Tns1    | CCGCACCCGCTCACCTTTCG     | CGCGCTGACTCCGGGAAGGA                 | SQ       | 251 | MSRE                          |
| Psme4   | GCGGCAGCGATGGCGATGAT     | CTGGGCTTGCAGCCTCTCAC                 | SQ       | 133 | MSRE                          |
| Bmp8b   | AGGAGGCGTCTTCCCCGGAC     | GGCGGATGCCAACCATGCCT                 | SQ       | 121 | MSRE                          |
| Fam196a | ACACTGGGCTACACCCGCCG     | CGCGGCAAGACATGCCCGAG                 | SQ       | 211 | MSRE                          |
| CryaA   | CATTCAGCATCCTTGGTTCA     | GCAGCAGGTCGTACTCAAAA                 | SQ, SYBR | 101 | MSRE & MeDIP;<br>control gene |
| Aprt    | GGGATATCTCGCCCCTCTT      | CACTCGCCTGCGATGTAGT                  | SYBR     | 115 | MeDIP, control gene           |
| B1      | TAACCTCAAACCTAAAAATCCACC | GTTGGGTGTAGTGGTATATATTTTT<br>AATTTTA | SQ       | 82  | Unmethylated, SINE            |
| B1      | CTCGAACTCAAACCTCCGCC     | GTCGGGCGTAGTGGTATATATTTTT            | SQ       | 78  | Methylated, SINE              |
| Alb     | GAGACCTTACCTTCCACTC      | GGTTGTGGTTGTGATGTGTT                 | SQ       | 262 | gene expression               |
| Tcr     | ACCCAGAACCTGCTGTGTA      | ATTCGGAGTCCATAACTGA                  | SQ       | 343 | gene expression               |
| Tet1    | GCTGGATTGAAGGAACAGGA     | GTCTCCATGAGCTCCCTGAC                 | SYBR     | 128 | gene expression               |
| Tet2    | GTCAACAGGACATGATCCAGGAG  | CCTGTTCCATCAGGCTTGCT                 | SYBR     | 103 | gene expression               |

- SYBR – real-time PCR with SYBR mix; TQ - real-time PCR with Taqman primers; SQ- semi-quantitative PCR.

## References

1. Rozen S and Skaletsky HJ, *Primer3 on the WWW for general users and for biologist programmers*, in *Bioinformatics Methods and Protocols: Methods in Molecular Biology*, S. Krawetz and S. Misener, Editors. 2000, Humana Press: Totowa, NJ. p. 365-386.
2. Dawlaty MM, Breiling A, Le T, Raddatz G, Barrasa MI, Cheng AW, Gao Q, Powell BE, Li Z, Xu M, Faull KF, Lyko F and Jaenisch R. Combined deficiency of Tet1 and Tet2 causes epigenetic abnormalities but is compatible with postnatal development. *Dev Cell*. 2013; 24(3):310-323.
